# Supplementary material for: Blinatumomab in pediatric patients with relapsed/refractory acute lymphoblastic leukemia: results of the RIALTO trial, an expanded access study
Source: PubMed Central journal article supplement (PMC7381625; doi:10.1038/s41408-020-00342-x), 2020-07-24
Supplement: 41408_2020_342_MOESM1_ESM.pdf [file 41408_2020_342_MOESM1_ESM.pdf]

This file includes additional methods and safety and efficacy results, along with a patient disposition figure, tables displaying baseline demographics and clinical characteristics, adverse events, and responses to blinatumomab treatment, overall and by subgroup.

## **Supplementary Material**

### **Supplementary Methods**

#### ***Inclusion criteria***

Patients previously treated with blinatumomab were eligible for inclusion provided that they were not intolerant or refractory to blinatumomab, and leukemic cells were still CD19 positive.

#### ***Exclusion criteria***

Patients with active acute (grade 2–4) or chronic graft-versus-host disease (GvHD) requiring systemic treatment, or active central nervous system or testicular involvement, were excluded. Other key exclusion criteria were receipt of chemotherapy within 2 weeks, radiotherapy within 4 weeks, and immunotherapy within 6 weeks, or systemic immunosuppressive drugs to treat GvHD within 2 weeks of blinatumomab treatment.

#### ***Treatments***

During a 2-week screening and pre-phase period, patients could receive dexamethasone or hydroxyurea to reduce tumor burden and the risk of tumor lysis syndrome. Dexamethasone was recommended prior to the first dose of blinatumomab and was required for patients with bone marrow blasts >50% at screening. During screening, patients received dexamethasone up to 24 mg/day for up to 4 days. Prophylactic dexamethasone was administered at 10 mg/m<sup>2</sup> from 6 to 12 hours before each infusion, and 5 mg/m<sup>2</sup> within 30 minutes of each infusion.

During induction and consolidation cycles, patients with ≤25% blasts at baseline received blinatumomab 15 µg/m<sup>2</sup> per day; those with >25% blasts at baseline received 5 µg/m<sup>2</sup> on days 1–7 of cycle 1, and 15 µg/m<sup>2</sup> per day thereafter.

Central nervous system prophylaxis was administered according to institutional/national standards within 1 week prior to starting blinatumomab, following each treatment cycle, and after bone marrow aspiration on day 29.

Dosing was interrupted if patients experienced a blinatumomab-related grade 2 clinically relevant neurologic event, grade 2 or higher cytokine release syndrome (CRS), tumor lysis syndrome, or disseminated intravascular coagulation or coagulopathy, or any clinically relevant event of grade 3 or higher. Following resolution to a minimum of grade 1, blinatumomab was restarted at 5 µg/m<sup>2</sup> per day for at least 7 days before increasing to 15 µg/m<sup>2</sup> per day. Blinatumomab was permanently discontinued if a patient experienced an adverse event (AE)-related infusion interruption that lasted

more than 2 weeks. Other criteria for discontinuation included disease progression, extramedullary relapse, or intolerable toxicity.

### ***Assessments***

AEs were graded according to National Cancer Institute's Common Terminology Criteria for Adverse Events version 4.03.

### ***Statistical analysis***

The primary endpoint of the study was the incidence of treatment-emergent and treatment-related AEs. The primary endpoint focused on safety rather than efficacy because, although blinatumomab has been evaluated previously in a phase 2 study of a pediatric population (von Stackelberg et al, 2016), the children included had different characteristics as compared to those in the present study.

A formal hypothesis was not tested; therefore, statistical reporting of this study is descriptive. The current analysis includes the first 110 patients enrolled. Safety analyses were performed on the full analysis set, which included all patients who received any infusion of blinatumomab. For response endpoints, patients with missing response data were considered non-responders. Survival endpoints were estimated by the Kaplan-Meier method or the Simon-Makuch method, with a 42-day landmark.

## **Supplementary Results**

### ***Safety and exposure***

The median number of treatment cycles completed was 1 (range, 1–5). Reasons for discontinuation of blinatumomab included proceeding to allogeneic hematopoietic stem cell transplantation (alloHSCT) (31%), disease progression (24%), hematological or extramedullary relapse subsequent to CR (9%), >25% leukemic blasts at the end of cycle 1 (8%), AEs (6%), requirement for alternative therapy (5%), study completion (5%), failure to achieve CR in the first 2 cycles (3%), and patient request (2%).

Grade 3 nervous system disorders were reported in 5 patients (5%), including 2 patients with headache, and one patient each who had depressed level of consciousness, seizure and a trigeminal nerve disorder, respectively (unrelated to study treatment).

### ***Efficacy***

Response data were not evaluable for one patient and unavailable for 2 patients; these were counted as non-responders in analyses. Of the 2 patients without response data, one died due to multiorgan failure and one experienced a leukemia phenotype switch to acute myeloid leukemia (AML). This latter patient was 17-month-old and had mixed lineage leukemia (MLL)-rearranged ALL. This case has been previously described (1).

Among patients with  $\geq 5\%$  blasts at baseline ( $n=98$ ), 58 (59.2% [95% CI, 48.8%–69.0%]) achieved complete remission during the first cycle of treatment with blinatumomab. Of these, 32 (32.7% [23.5–42.9]) achieved full hematologic recovery and 43 (74.1% [61.0–84.7]) achieved an MRD response.

Six patients who did not achieve CR in the first 2 cycles proceeded to alloHSCT, following additional chemotherapy. Of these, two completed the study, 2 died from disease progression, and 2 died from pulmonary complications. Among patients achieving CR ( $n=69$ ), 40 (58%) completed the study in remission, 23 (33%) relapsed during follow-up and 6 (9%) died. Of the latter, one died from disease progression, 2 died from infection, 2 died from respiratory distress syndrome and one died from hypovolemic shock. Six of 23 relapses (26%) were CD19 negative, including one AML phenotype switch; this patient discontinued blinatumomab and subsequently had a CD19-positive ALL relapse.(1) CD19 status at the time of relapse was unavailable for one patient.

**Supplementary Fig. 1. Patient disposition.**

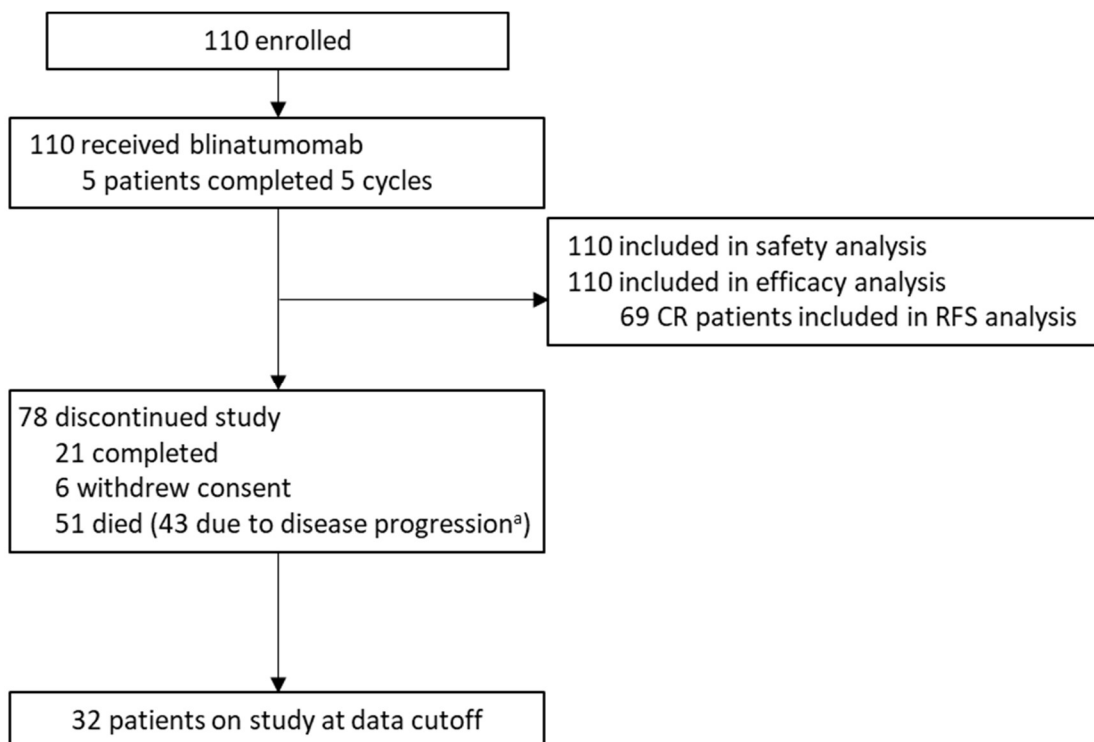

<sup>a</sup>16 of the 51 patients (31.4%) who died by end of study had a clinical response in the first two cycles RFS, relapse-free survival.

**Supplementary Fig. 2.** Kaplan-Meier plot of overall survival after HSCT by MRD response status during the first two cycles of blinatumomab (Full Analysis Set - Subjects who had CR)

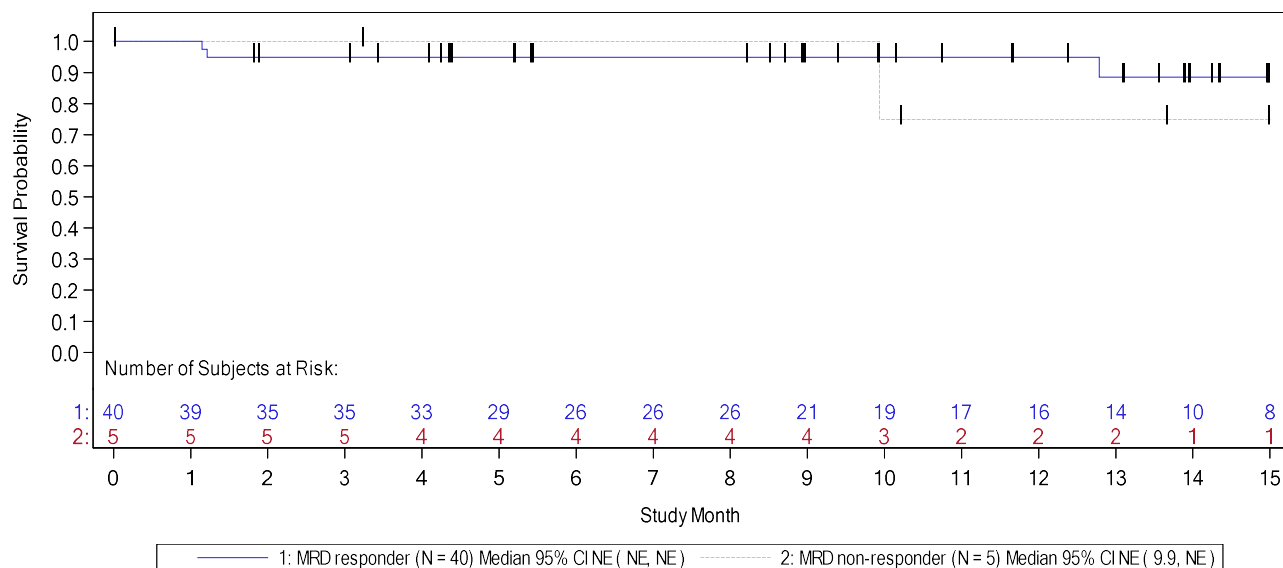

Censor indicated by vertical bar | Months=days/30.5. Figure includes retreatment data (treated as cycle 2) for one subject. Data cutoff date: September 27, 2018.

CI, confidence interval; CR, complete response; HSCT, hematopoietic stem cell transplantation; MRD, minimal residual disease; NE, not estimable.

**Supplementary Table 1.** Baseline demographics and clinical characteristics.

| Characteristic                                     | All patients (N=110) |
|----------------------------------------------------|----------------------|
| Age, median (range), years                         | 8.5 (0.4–17.0)       |
| Age group, years, n (%)                            |                      |
| 0–1                                                | 13 (12)              |
| 2–6                                                | 31 (28)              |
| 7–17                                               | 66 (60)              |
| Sex, n (%)                                         |                      |
| Male                                               | 62 (56)              |
| Female                                             | 48 (44)              |
| Geographic location, n (%)                         |                      |
| Europe                                             | 101 (92)             |
| North America                                      | 9 (8)                |
| Blast category, n (%)                              |                      |
| <5% with MRD $\geq 10^{-3}$                        | 12 (11)              |
| 5–49%                                              | 55 (50)              |
| $\geq 50\%$                                        | 42 (38)              |
| Unknown                                            | 1 (1)                |
| Current genetic abnormalities <sup>a</sup> , n (%) |                      |
| MLL rearrangement                                  | 18 (16)              |
| t(9;22) BCR-ABL                                    | 5 (5)                |
| t(17;19)                                           | 2 (2)                |
| t(12;21)/TEL-AML1                                  | 9 (8)                |
| Hypo/hyperdiploidy                                 | 1 (1)/6 (5)          |
| Other <sup>b</sup>                                 | 16 (15)              |
| Constitutional trisomy 21 (Down syndrome), n (%)   | 4 (4)                |

|                                   |         |
|-----------------------------------|---------|
| Prior therapy, n (%)              |         |
| HSCT                              | 45 (41) |
| Blinatumomab                      | 5 (5)   |
| Disease history, n (%)            |         |
| Primary refractory disease        | 17 (16) |
| Refractory to reinduction therapy | 23 (21) |
| Second or greater relapse         | 61 (55) |
| Relapse after HSCT                | 44 (40) |

<sup>a</sup>More than one type of genetic abnormality can be selected for the same subject. Table includes retreatment data (treated as cycle 2) for one patient.

<sup>b</sup>Includes t(1;19)/E2A-PBX1 (3 patients), IKZF1 deletion (2 patients), t(5;14)/IL3-IGH (1 patient), t(4;11) (Q21;Q23) (1 patient), monosomy 17 (1 patient), N-RAS mutation (1 patient), INPP5D-ABL1 fusion (1 patient), homozygote IKARUS mutation (1 patient), CD10+, CYTDT+, CYIGM, CD34, aberrant co-expression with CD133 (1 patient), and complex karyotype with abnormalities of chromosomes 5, 15, 16, 17 and 19 (1 patient).

HSCT, hematopoietic stem cell transplantation; MLL, mixed lineage leukemia; MRD, minimal residual disease.

**Supplementary Table 2.** Treatment-emergent and treatment-related adverse events.

| AE, n (%)                                                      | Treatment emergent |           | Treatment related |           |
|----------------------------------------------------------------|--------------------|-----------|-------------------|-----------|
|                                                                | All grades         | Grade ≥3  | All grade         | Grade ≥3  |
| Any AE                                                         | 109 (99.1)         | 71 (64.5) | 81 (73.6)         | 29 (26.4) |
| <b>AEs occurring in ≥10% for all grade or ≥5% for grade ≥3</b> |                    |           |                   |           |
| Pyrexia                                                        | 92 (83.6)          | 15 (13.6) | 63 (57.3)         | 11 (10.0) |
| Vomiting                                                       | 30 (27.3)          | 1 (0.9)   | 11 (10.0)         | 0         |
| Headache                                                       | 27 (24.5)          | 2 (1.8)   | 11 (10.0)         | 2 (1.8)   |
| Cytokine release syndrome                                      | 22 (20.0)          | 2 (1.8)   | 18 (16.4)         | 2 (1.8)   |
| Anemia                                                         | 20 (18.2)          | 5 (4.5)   | 3 (2.7)           | 0         |
| Nausea                                                         | 20 (18.2)          | 0         | 8 (7.3)           | 0         |
| Cough                                                          | 19 (17.3)          | 0         | 1 (0.9)           | 0         |
| Pain                                                           | 18 (16.4)          | 2 (1.8)   | 4 (3.6)           | 1 (0.9)   |
| Hypotension                                                    | 14 (12.7)          | 2 (1.8)   | 5 (4.5)           | 2 (1.8)   |
| Pain in extremity                                              | 14 (12.7)          | 0         | 4 (3.6)           | 0         |
| Abdominal pain                                                 | 12 (10.9)          | 0         | 3 (2.7)           | 0         |
| Hypokalemia                                                    | 12 (10.9)          | 8 (7.3)   | 4 (3.6)           | 3 (2.7)   |
| Platelet count decreased                                       | 12 (10.9)          | 11 (10.0) | 1 (0.9)           | 1 (0.9)   |
| Alanine aminotransferase increased                             | 11 (10.0)          | 7 (6.4)   | 1 (0.9)           | 1 (0.9)   |
| Constipation                                                   | 11 (10.0)          | 0         | 1 (0.9)           | 0         |
| Febrile neutropenia                                            | 11 (10.0)          | 10 (9.1)  | 3 (2.7)           | 3 (2.7)   |
| Fluid balance positive                                         | 11 (10.0)          | 0         | 0                 | 0         |
| Neutropenia                                                    | 11 (10.0)          | 8 (7.3)   | 1 (0.9)           | 1 (0.9)   |
| Rash                                                           | 11 (10.0)          | 0         | 5 (4.5)           | 0         |
| Thrombocytopenia                                               | 10 (9.1)           | 5 (4.5)   | 0                 | 0         |
| <b>AE categories of interest</b>                               |                    |           |                   |           |
| Infusion reactions                                             | 76 (69.1)          | 12 (10.9) | 54 (49.1)         | 10 (9.1)  |
| Infections                                                     | 50 (45.5)          | 20 (18.2) | 9 (8.2)           | 4 (3.6)   |
| Neurologic events                                              | 47 (42.7)          | 6 (5.5)   | 22 (20.0)         | 4 (3.6)   |
| Cytopenias                                                     | 41 (37.3)          | 32 (29.1) | 7 (6.4)           | 7 (6.4)   |
| Elevated liver enzymes                                         | 22 (20.0)          | 14 (12.7) | 4 (3.6)           | 3 (2.7)   |
| Cytokine release syndrome                                      | 22 (20.0)          | 2 (1.8)   | 18 (16.4)         | 2 (1.8)   |
| Decreased immunoglobulins                                      | 8 (7.3)            | 0         | 5 (4.5)           | 0         |
| Tumor lysis syndrome                                           | 5 (4.5)            | 3 (2.7)   | 4 (3.6)           | 2 (1.8)   |
| Capillary leak syndrome                                        | 1 (0.9)            | 0         | 0                 | 0         |

AE, adverse event.

**Supplementary Table 3.** Best response during the first two cycles of blinatumomab treatment.

| Response                                            | Patients with $\geq 5\%$ blasts at baseline (N=98) |                  |
|-----------------------------------------------------|----------------------------------------------------|------------------|
|                                                     | n                                                  | % (95% CI)       |
| CR                                                  | 58                                                 | 59.2 (48.8–69.0) |
| CR with full recovery of peripheral blood counts    | 39                                                 | 67.2 (53.7–79.0) |
| CR with partial recovery of peripheral blood counts | 6                                                  | 10.3 (3.9–21.2)  |
| CR without recovery of peripheral blood counts      | 13                                                 | 22.4 (12.5–35.3) |
| MRD response                                        | 46                                                 | 79.3 (66.6–88.8) |
| Hypoplastic or acellular bone marrow                | 1                                                  | 1.0 (0.0–5.6)    |
| Partial remission                                   | 0                                                  | 0.0 (0.0–3.7)    |
| Stable disease                                      | 5                                                  | 5.1 (1.7–11.5)   |
| Progressive disease                                 | 31                                                 | 31.6 (22.6–41.8) |
| Not evaluable                                       | 1                                                  | 1.0 (0.0–5.6)    |
| No response data                                    | 2                                                  | 2.0 (0.25–7.2)   |
|                                                     | Patients with $< 5\%$ blasts at baseline (N=12)    |                  |
| MRD response                                        | 11                                                 | 91.7 (61.5–99.8) |
| No MRD response                                     | 0                                                  | 0                |
| Progressive disease                                 | 0                                                  | 0.0 (0.0–26.5)   |
| No MRD response data                                | 1                                                  | 8.3 (0.2–38.5)   |

CR, complete remission; MRD, minimal residual disease.

## References

1. Wolf M, Rasche M, Eyrich M, Schmid R, Reinhardt D, Schlegel PG. Spontaneous reversion of a lineage switch following an initial blinatumomab-induced ALL-to-AML switch in MLL-rearranged infant ALL. *Blood Adv.* 2018;2(12):1382-5.
